# Supplementary material
Source: PubMed Central journal article supplement (PMC3873336)
Supplement: NIHMS528264-supplement-Supplemental_Data.pdf [file NIHMS528264-supplement-Supplemental_Data.pdf]

**Supplemental Table I Antibodies Used to Target Canine SSC Markers**

**A: Primary Antibodies**

| Target Molecule | Host Species | Isotype | Target Species | Vendor        | Catalogue # | Optimal Dilution |
|-----------------|--------------|---------|----------------|---------------|-------------|------------------|
| VASA(DDX4)      | Rabbit       | IgG     | Human          | abcam         | ab13840     | 100X             |
| DAZL            | Goat         | IgG     | Human          | NOVUS         | NB100-2437  | 50X              |
| UCHL1           | Goat         | IgG     | Human          | Santa Cruz    | SC-23852    | 30x              |
| PLZF (A)        | Goat         | IgG     | Human          | R and D Syst. | AF2944      | 40X              |
| PLZF (B)        | Mouse        | IgG     | Human          | Santa Cruz    | SC-28319    | 25X              |
| AP180           | Rabbit       | IgG     | Rat            | abcam         | ab33898     | 50X              |
| POUF5 (Oct3/4)  | Goat         | IgG     | Human          | R and D Syst. | AF1759      | 30X              |
| RET             | Rabbit       | IgG     | Human          | Santa Cruz    | sc-13104    | 33X              |
| GATA4           | Goat         | IgG     | Mouse          | Santa Cruz    | sc-1237     | 50X              |
| Vimentin        | Mouse        | IgG     | Human          | Santa Cruz    | SC-58901    | 100X             |
| Alpha Actin     | Mouse        | IgG     | Human          | Santa Cruz    | SC-69972    | 100X             |

**B: Secondary Antibodies**

| Target Molecule | Host Species | Isotype | label     | Vendor     | Catalogue # | Optimal Dilution |
|-----------------|--------------|---------|-----------|------------|-------------|------------------|
| Goat IgG        | Donkey       | IgG     | Alexa 488 | Invitrogen | A11055      | 1000X            |
| Rabbit IgG      | Donkey       | IgG     | Alexa 488 | Invitrogen | A21206      | 1000X            |
| Rat IgG         | Donkey       | IgG     | Alexa 488 | Invitrogen | A21208      | 1000X            |
| Mouse IgG       | Donkey       | IgG     | Alexa 488 | Invitrogen | A21202      | 1000X            |
| Goat IgG        | Donkey       | IgG     | Alexa 594 | Invitrogen | A11058      | 1000X            |
| Rabbit IgG      | Donkey       | IgG     | Alexa 594 | Invitrogen | A21207      | 1000X            |
| Rat IgG         | Donkey       | IgG     | Alexa 594 | Invitrogen | A21209      | 1000X            |
| Mouse IgG       | Donkey       | IgG     | Alexa 594 | Invitrogen | A21203      | 1000X            |



Supplementary Table III

## RT-PCR Primers used for analysis of gene expression

| Gene      | Accession #  | Forward Primer             | Reverse Primer               | Product Size (bp) |
|-----------|--------------|----------------------------|------------------------------|-------------------|
| GAB2      | XM_542285    | CCCAACCTTGTTACACCTTTGAACC  | TCCATATTGTCCACCAGGAGGTCC     | 430               |
| TERT      | NM_009354    | GGAGCCAGAACATTCCACAGAGAC   | CGGCGTCCCTCAACAAGCTTGTC      | 461               |
| ACTB      | NM_001195845 | GATGACGATATCGCTGCGCTTG TG  | CATCACGATGCCAGTGGTGCGG       | 455               |
| GAPDH     | NM_001003142 | CTTCCAGGAGCGAGATCCCGCC     | TGTAGCCCAGGATGCCTTTGAGG      | 601               |
| CYP A     | AF243140     | CCGTGTTCTTTGACATCGCCGTG    | GTT CAGATAAAACAGGAGTTAAGATTC | 504               |
| POUF5     | XM_538830    | TCGTGAAGCCGGACAAGGAGAAG    | AGGAACATGTTCTCCAGGTTGCCT     | 378               |
| KLF4      | XM_538779    | AGTCTGACATGGCTGTCAGCGAC    | ATCGGGTAGCTGAAGCTGCAGGT      | 439               |
| ITGb1     | XM_535143    | GATGCCTTACATTAGTACGACGCC   | TGCAGATAATGTTCTACTGCTGAC     | 510               |
| PLZF      | XM_845250    | CTGTGTCCATGGACTTCAGCACC    | TGCACTCGCTGCAGATGTAGCTG      | 531               |
| RET       | XM_543915    | CAAAGGGATCACCAGAAACTTCTCC  | AGGGAATTCCCACTTAGGATCCTC     | 513               |
| ITGA6     | XM_535964    | GCTCTATTTGGTAAAAGTCGAGTCC  | CACAGTCACACGAATCTGAGTGCC     | 409               |
| GPR125    | XM_545977    | AATAGATGGCGTGAATGTGGATACC  | GGGTTATTCTCCACGAAGACC        | 434               |
| NCAD      | XM_537293    | TCACTGCTATTGATGCTGATGATCC  | GCTGATCCTGTACGCAGCATTCC      | 404               |
| FGF9      | XM_844845    | GTTGGGAACTATTTGGGTGTGCAG   | ACATAGTATCGCCTTCCAGTGTCC     | 477               |
| VASA      | XM_544339    | GTGCAGGTAATGGTGACACTTACC   | AGCACAAGCCATCAAATCTCGTCC     | 425               |
| GFRA1     | XM_846994    | GGGAAATGATCTGCTCGAAGATTCC  | AAATTCAGGCAGTTGGGCTTCTCC     | 405               |
| LIFR.     | NM_001005760 | ACAGTTCATCACTGGAGTTGGACC   | ATGCGGTTGGTCTTCTCGATTCC      | 463               |
| NANOS2    | XM_541547    | CAGCCTTCGACATGTGGAAGGAC    | CTCCTGATCCTCAGCGCTTGACC      | 406               |
| NANOS3    | XM_542028    | TACTGCCCAGCTATGGGAACC      | GTGGTGTAGCTGTAGACAGAGGTG     | 382               |
| NRG1      | XM_853176    | GAGCATATGTGTCTTCAGAGTCTCC  | TGAGGCCGTTTGTATGTTCCACC      | 448               |
| PIWI 1(B) | XM_534638    | TATTATAGTAAGGCTGAGCACTAACC | TTGAAGGATAGAGGTGGTGAAGCC     | 448               |
| PIWI2     | XM_543251    | TATCAGCCTGACTTGTCGAGATCC   | CTTAATGTTGATATCTGCGCCATCAG   | 406               |
| FGFR3     | XM_545926    | GGCCATCGGTATTGACAAGGACC    | TAATAGTCGAGGTTGTGCACGTCC     | 454               |
| FZD3      | XM_543219    | CAGCTTTAGCAATGGAGCCATTCC   | GGAGGTGAACAATCACGCACGTG      | 392               |
| DAZL      | XM_534251    | AGCTGAAACTGGGACCTGCAATCAG  | ACCACAGTCTGTATGCTTCTGTCC     | 447               |
| AP180     | NM_001194957 | TGACCTTGACTCATCTCTTGCCAG   | GATGTTAAGATCCGCTAATGGGTCC    | 444               |
| UCHL1     | XM_536245    | TAAGGTGTACTTCATGAAGCAGACC  | GCATTAGGCTGCCTTG CAGAGTG     | 444               |
| PTN       | XM_532732    | GCCAGAAGACAGTCACCATCTCC    | ACTTACCTCAATGTTCTAGCATGTAC   | 378               |
| RTPRZ1    | XM_539545    | CAGCAAATTC AACAGGAAGGGACC  | TGACCATCAGGAAGCATGACTACC     | 418               |

**SupplementaryTable IV SSC Transplant Information**

| Recipient |       |        | Donor    |             |      |                  |                      | Harvest             |
|-----------|-------|--------|----------|-------------|------|------------------|----------------------|---------------------|
| Animal #  | Breed | Testis | SSC Prep | Breed       | Age  | # Cells Injected | Transduced Reporters | Sperm / epididymous |
| 795933    | Hound | R      | SSC15    | Sheba Inu   | 4 m  | 8.0E+05          | none                 |                     |
|           |       | L      | SSC17    | Choc. Lab   | 2 m  | 8.0E+05          | none                 |                     |
| 795941    | Hound | R      | SSC24    | Rat Terrier | 7 m  | 5.5E+05          | EF1 $\alpha$ -EGFP   | 1.10E+08            |
|           |       | L      | SSC25    | Lab mix     | 10 w | 2.0E+06          | EF1 $\alpha$ -EGFP   | 1.80E+08            |
| 795917    | Hound | R      | SSC26    | Lab/Poodle  | 6 m  | 2.0E+05          | Stra8-mCherry        | 4.60E+08            |
|           |       | L      | SSC21    | Pit Bull    | 3 m  | 7.2E+05          | EF1 $\alpha$ -EGFP   | 2.90E+08            |

**Supplementary Table V Primers Used for Detection of Donor Sperm**

**A: Reporter Vector Targets for Distinguishing Transgenic Donor Cells**

| Region of Vector    | Source Sequence             | Forward Primer             | Reverse Primer           | Size (bp) |
|---------------------|-----------------------------|----------------------------|--------------------------|-----------|
| 5' LTR and adjacent | PL-SIN-EF1 $\alpha$ -EGFP * | CTCAGACCCCTTTAGTCAGTGTGG   | CTGAAGGGATGGTTGTAGCTGTCC | 397       |
| 3' LTR and adjacent | PL-SIN-EF1 $\alpha$ -EGFP * | TTTAAGACCAATGACTTACAAGGCAG | CCACACTGACTAAAAGGGTCTGAG | 286       |
| GFP coding          | PL-SIN-EF1 $\alpha$ -EGFP * | AAACGGCCACAAGTTCAGCGTGTC   | CCTTGAAGAAGATGGTGCGCTCC  | 239       |
| canine cMyc gene    | Acc # X95367                | AGAATTCATGACCGATTCCAGTTCC  | CTTAAGAGATGCCATGTGTCCACC | 473       |

**B: Microsatellite Targets for VNTR Analysis of Donor / Recipient Chimerism of Sperm**

| Locus   | Chromosome Position | Forward Primer         | Reverse Primer                |
|---------|---------------------|------------------------|-------------------------------|
| FH 2001 | 23:50,961,275       | TCCTCCTCTTCTTTCCATTGG  | 5FAM-TGAACAGAGTTAAGGATAGACACG |
| FH2199  | 31:7,285,015**      | GCTGAGCACTGGGTATTGTATG | 6FAM-TGTTACAAATTAATGTGAAATGGC |
| FH2611  | 36:9,233,642        | GAAGCCTATGAGCCAGATCA   | 6FAM-TGTTAGATGATGCCTTCCTTCT   |

(\*) Lenti vector reported by Hotta et al. (2009) and available through Addgene (<https://www.addgene.org/>) as plasmid # 21320

(\*\*) Exact position uncertain due to uncertainties in canine genome at this locus

Supplemental Figure 1: Co-expression of SSC antigens in testis.

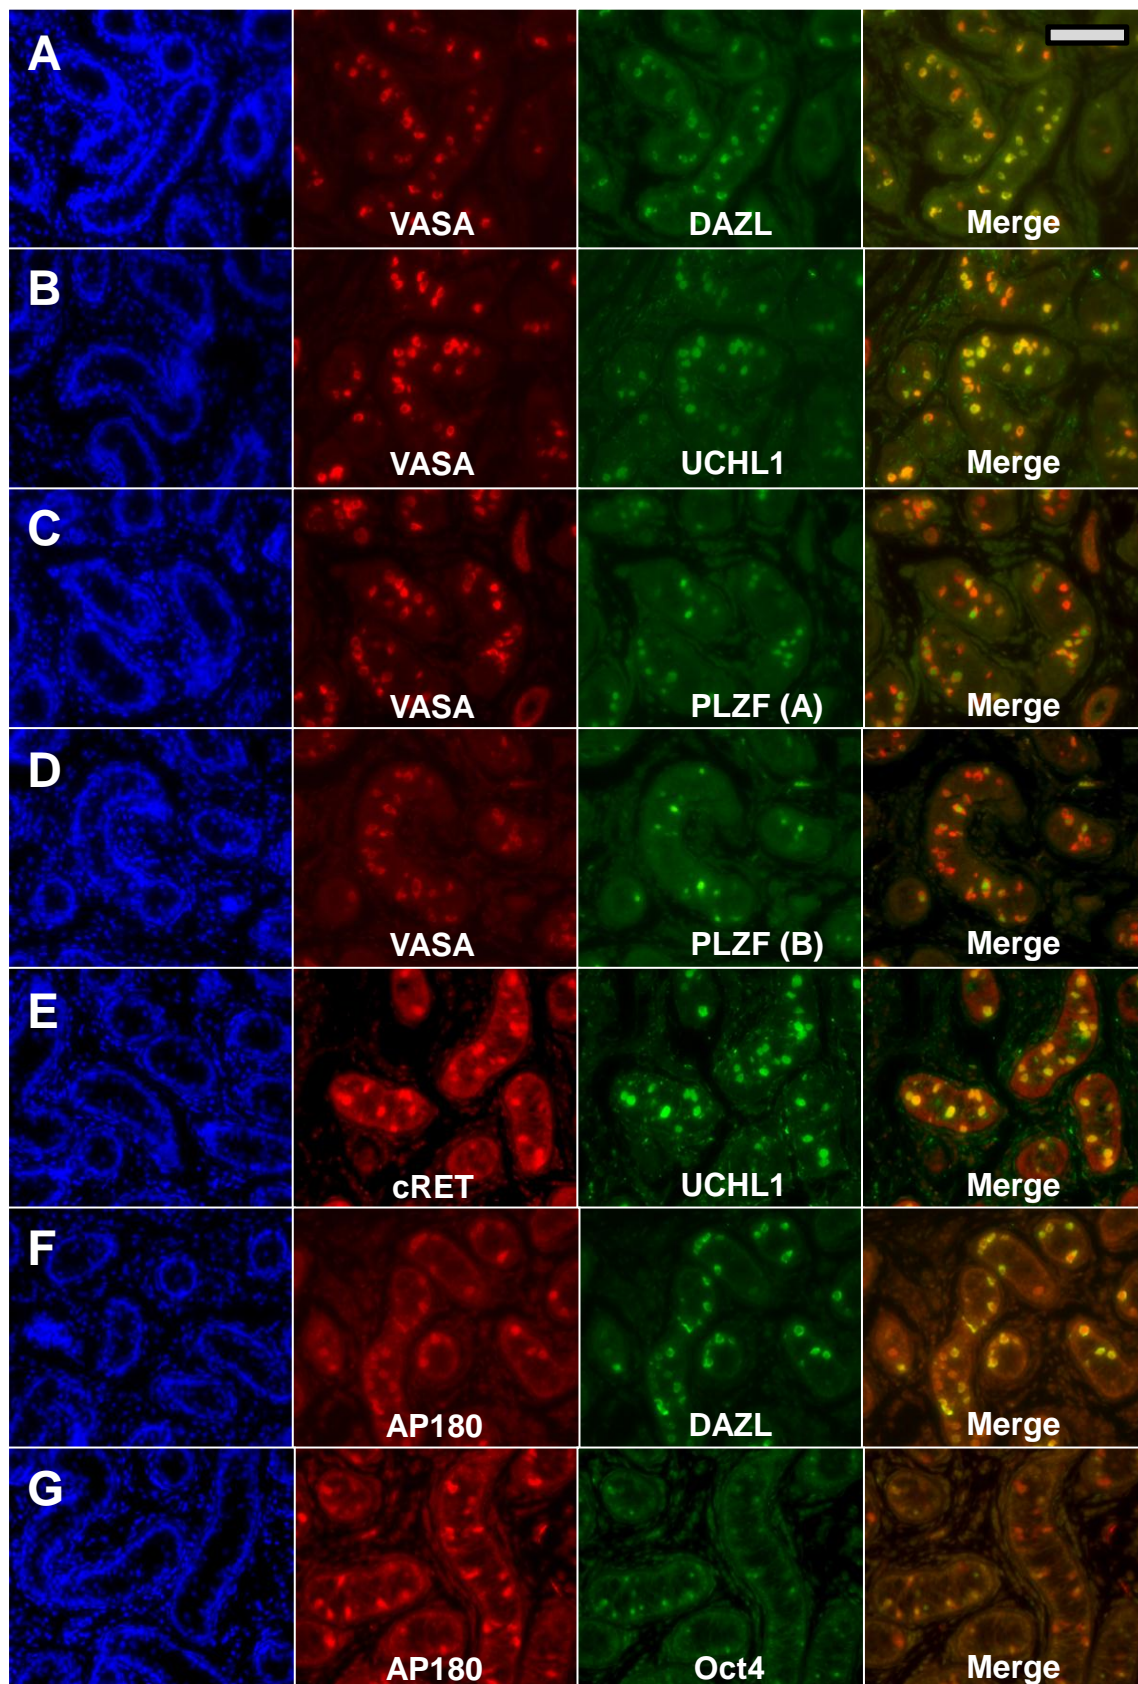

**Supplemental Figure 1. Co-localization of SPG Markers in Canine Testis.** Paraffin sections of pre-pubertal canine testis were probed by immunofluorescence for pairs of the SPG markers identified in Fig. 1. Appropriate secondary antibodies labeled with Alexa-594 (red) and Alexa-488 (green) were used to distinguish the targets. Sections were counter-stained with Hoechst 33342 (blue) to label nuclei. In each row, the first 3 images show localization of individual probes, and the final image (right) merges the two antibody probe images. Individual targeted antigens are indicated for each image. Bar = 100 uM.

Supplemental Figure 2: Double Immunofluorescence of 30 Day SSC Culture

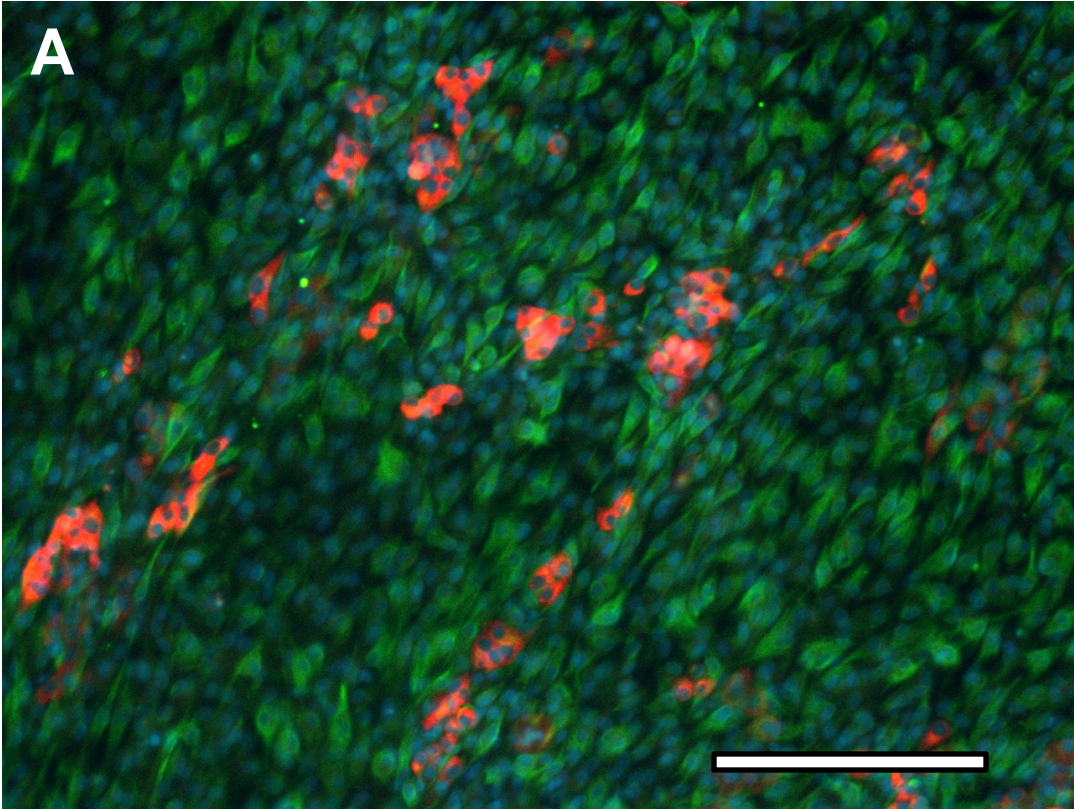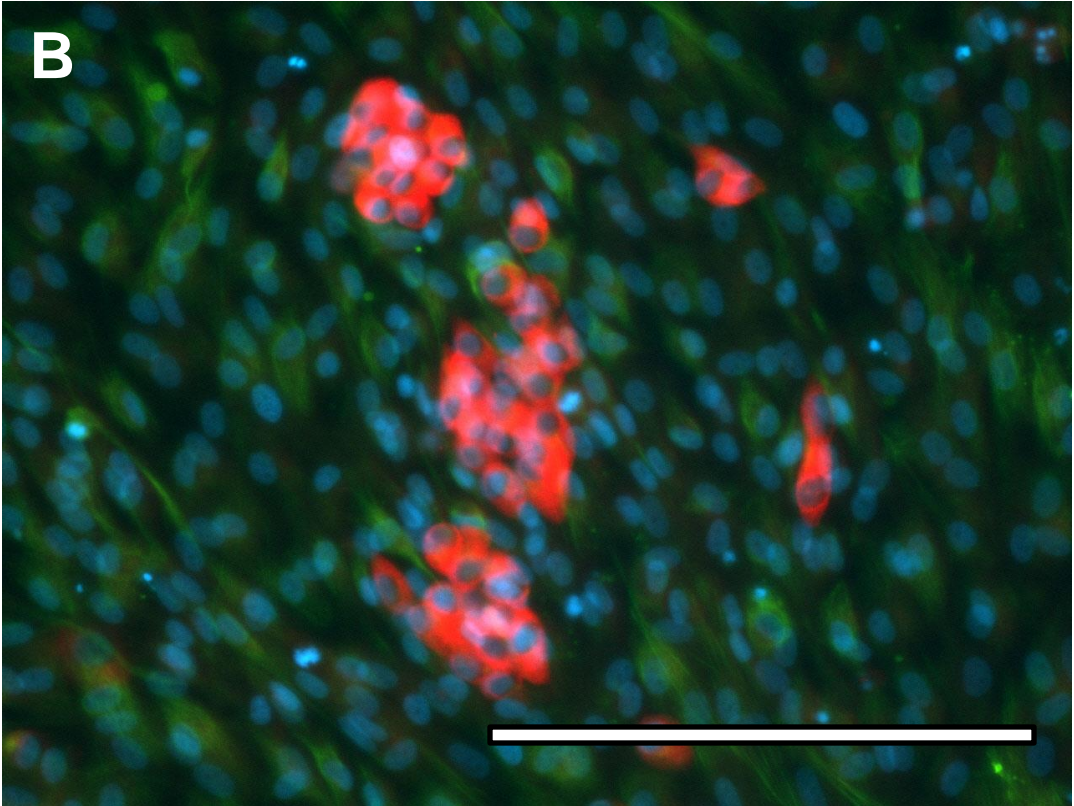



**Supplemental Figure 2. Double-Immunofluorescence to Distinguish SPG from Somatic Cells in Culture .** After 30 days culture of enriched SPG, the cells were fixed in formalin and probed for VASA as a germ cell marker (red) and both vimentin and alpha actin as somatic cell markers (green). Appropriate secondary antibodies labeled with Alexa-594 (red) and Alexa-488 (green) were used to distinguish the targets. Cells were counter-stained with Hoechst 33342 (blue) to label nuclei. VASA-positive germ cells are clearly distinguishable from the lawn of rapidly expanding somatic cells in the culture. Bar = 100 uM.

**Supplemental Figure 3: The SSC-specific expression profile is lost after 30 days culture of “loose” cells.**

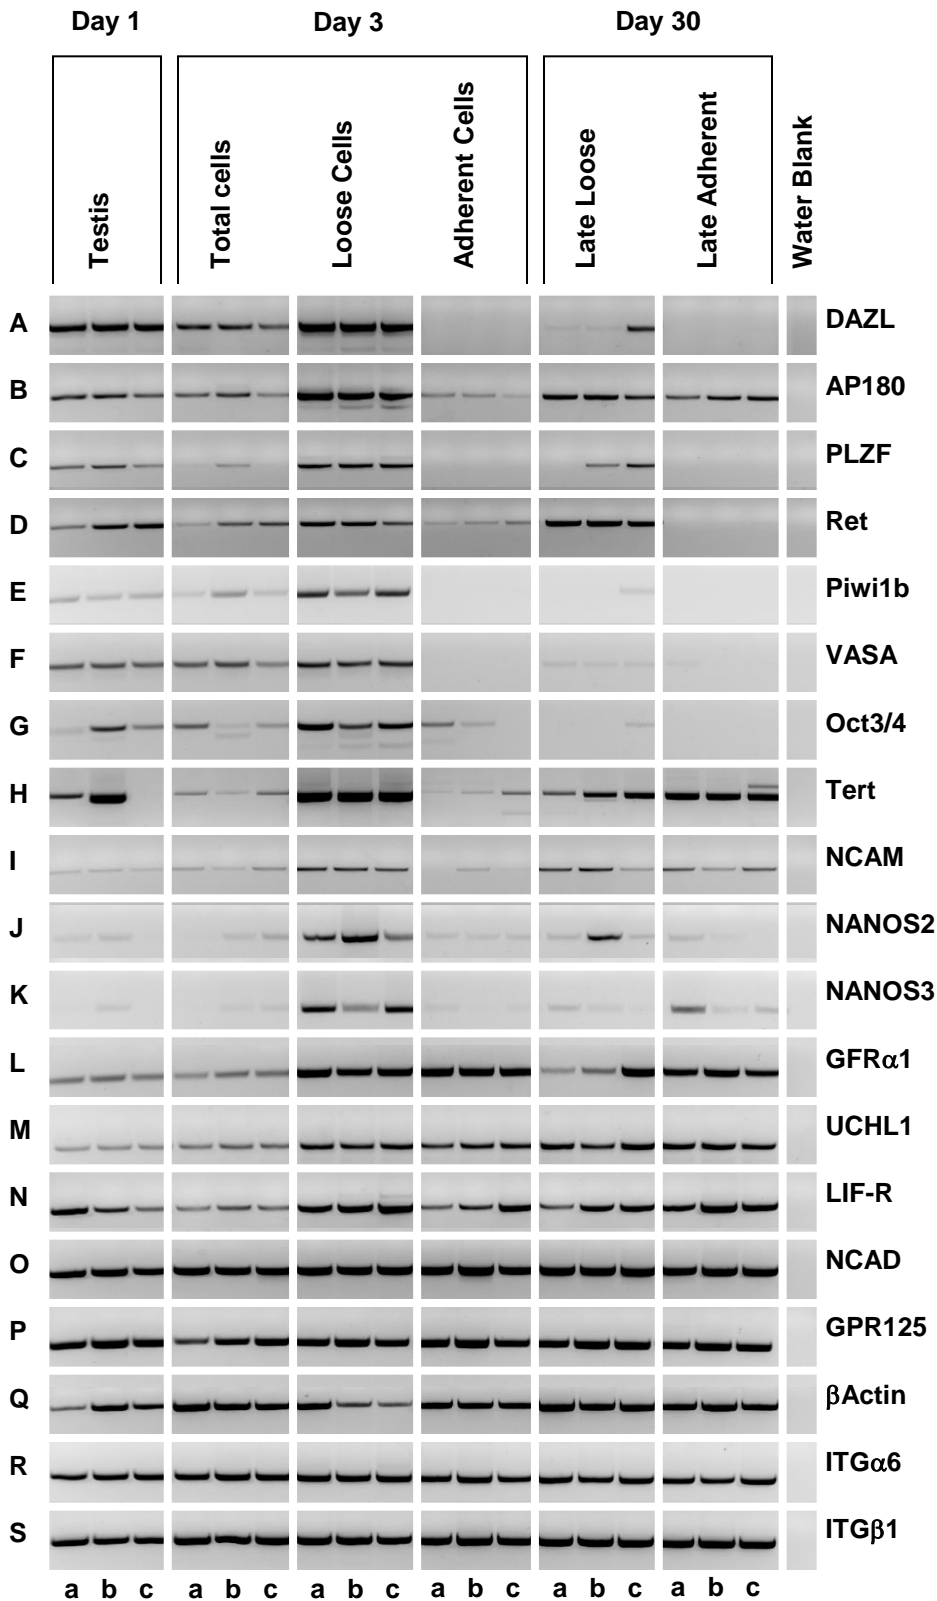

**Supplemental Figure 3. The SPG -Specific Expression Profile is Lost after 30 Days in Culture).** The expression analysis from SPG cultures in Figure 4D was extended to 30 days of culture. Day 1 and Day 3 data from Figure 4D are repeated here for comparison. Duplicate plates of freshly isolated SPG (loose cells), and adherent cells were cultured from each of the three testis cell suspensions (a,b, and c) were cultured for an additional 30 days, and analyzed for expression of the designated mRNAs by RTPCR. The RTPCR reactions for 3-day and 30-day samples were done at the same time under identical conditions. It is evident that the enrichment of SPG marker mRNAs seen at day 3 (lines A-K), is mostly lost by day 30.

**Supplemental Figure 4: Histology and VASA Expression in Testis 14 Months Post-Transplant.**

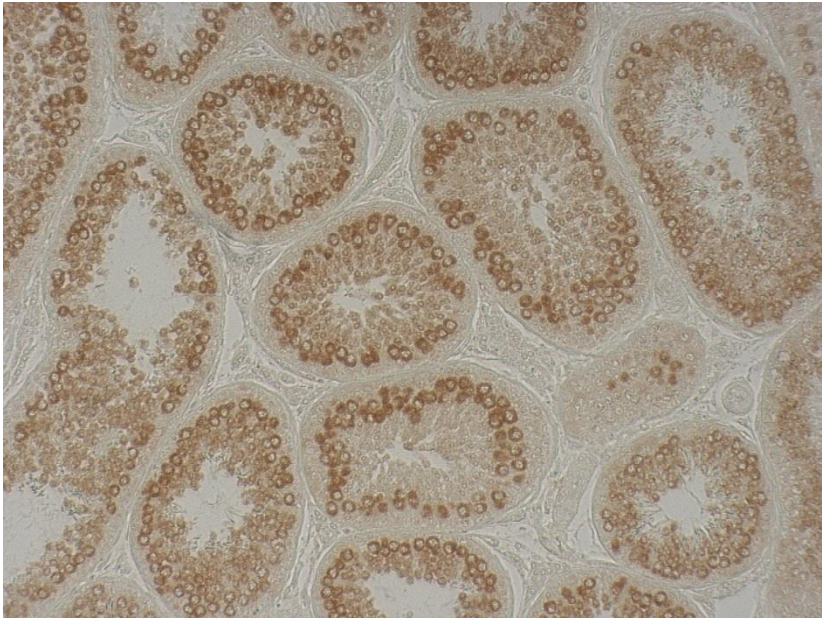

**Supplemental Figure 4. Normal Histology and VASA Expression in Seminiferous tubules 14 Months Post-Transplant.** A representative paraffin section of a testis from dog 795941, that was probed for VASA using DAPI immunohistochemistry. Note that all tubules contain VASA-positive cells and show the normal histology of a fully functional spermatogenic seminiferous tissue, indicating full recovery of spermatogenesis. This is representative of all observed sections from all three animals in this study.
